# Supplementary material for: Climate change effects on Chikungunya transmission in Europe: geospatial analysis of vector’s climatic suitability and virus’ temperature requirements
Source: PubMed Central journal article supplement (PMC3834102; doi:10.1186/1476-072x-12-51), 2013-11-12
Supplement: 1476-072X-12-51-S3.pdf [file 1476-072X-12-51-S3.pdf]

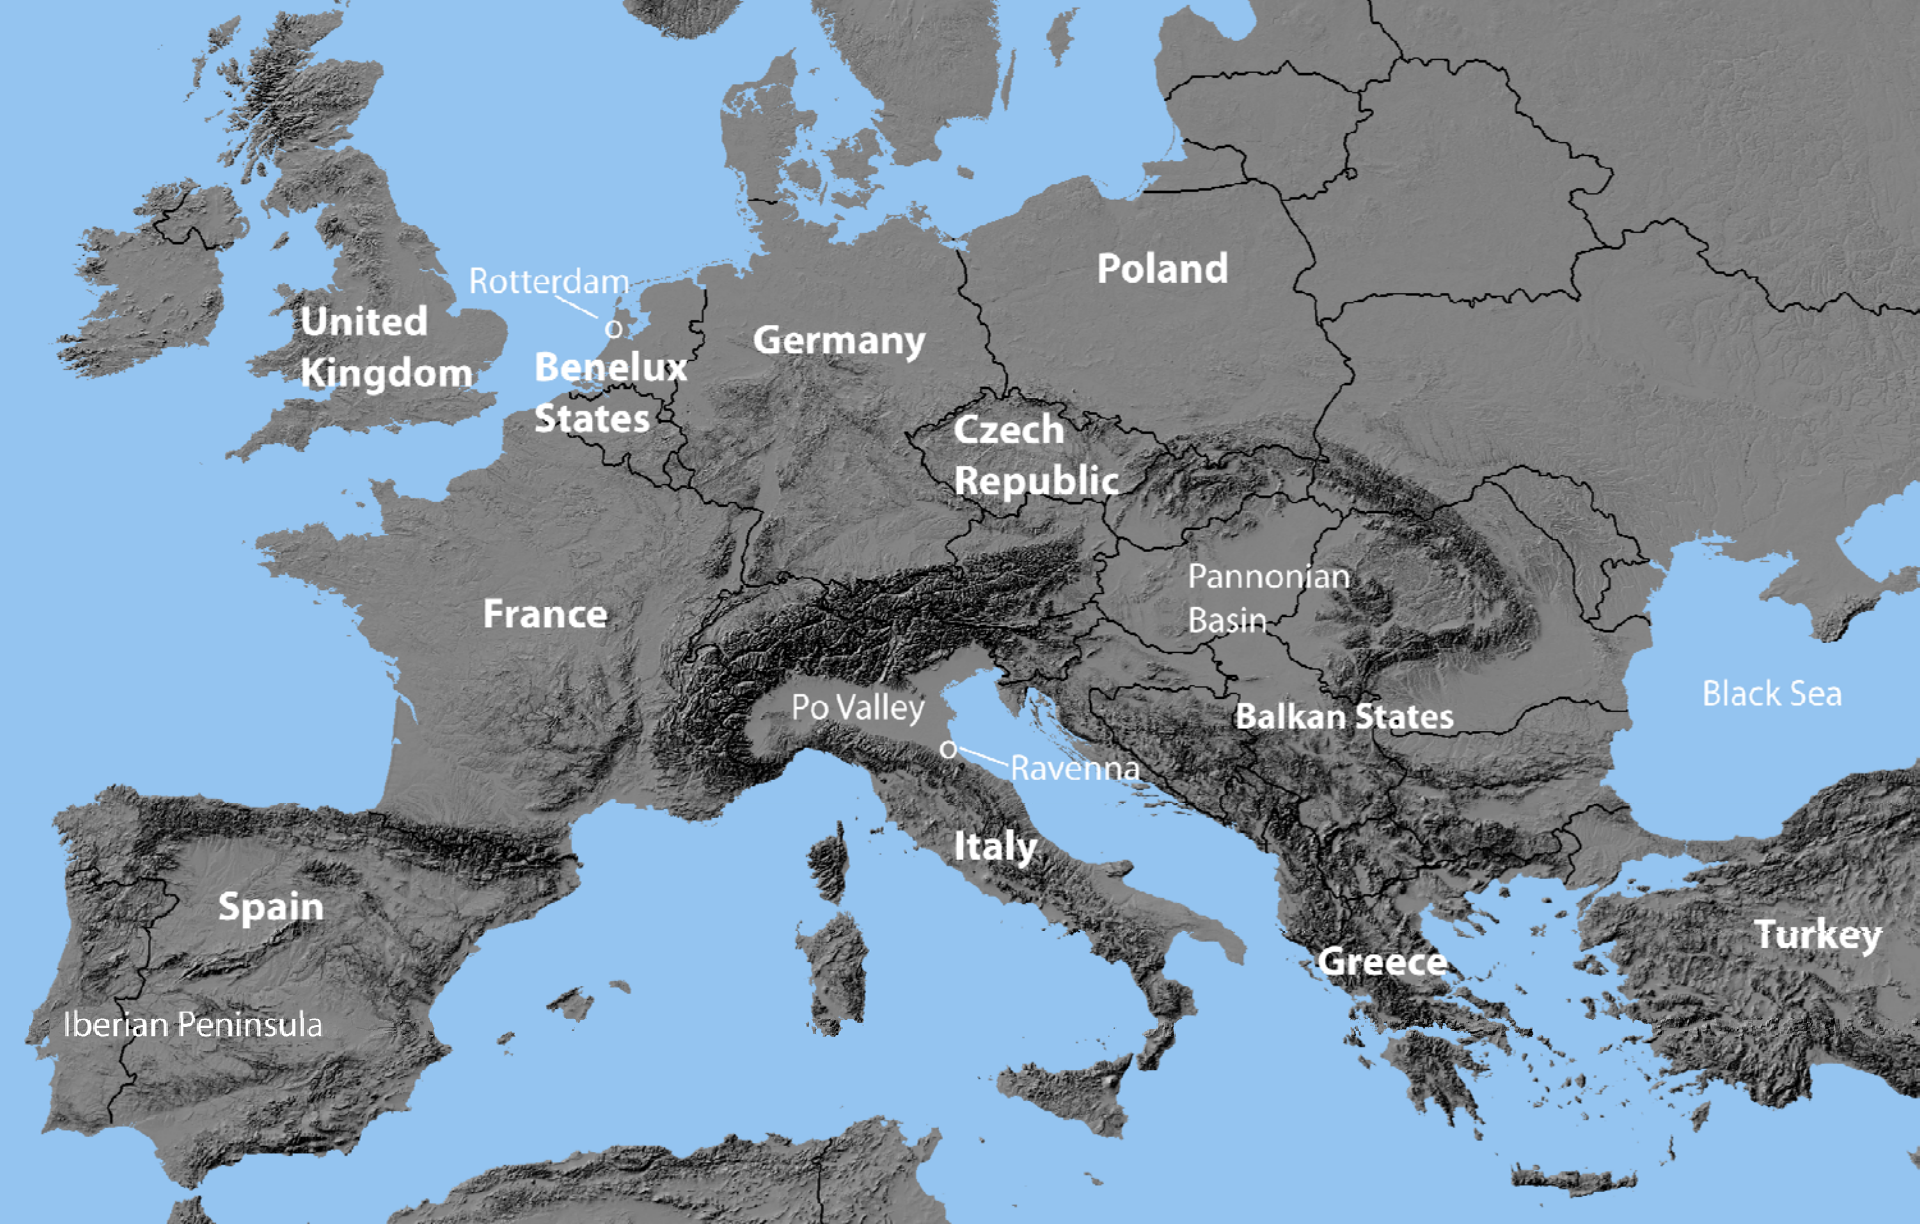

Additional file 3

**Climate change effects on Chikungunya transmission in Europe:  
Geospatial analysis of vector's climatic suitability and virus' temperature requirements**

Dominik Fischer, Stephanie M. Thomas, Jonathan E. Suk, Bertrand Sudre, Andrea Hess, Nils B. Tjaden, Carl Beierkuhnlein, Jan C. Semenza
